# Supplementary material for: Aphids transform and detoxify the mycotoxin deoxynivalenol via a type II biotransformation mechanism yet unknown in animals
Source: PubMed Central journal article supplement (PMC5144147; doi:10.1038/srep38640), 2016-12-08

**Aphids transform and detoxify the mycotoxin deoxynivalenol via a type II biotransformation mechanism yet unknown in animals**

N. De Zutter<sup>1,2\*</sup>, K. Audenaert<sup>2\*</sup>, N. Arroyo-Manzanares<sup>3\*</sup>, M. De Boevre<sup>3</sup>, C. Van Poucke<sup>3</sup>, S. De Saeger<sup>3</sup>, G. Haesaert<sup>2\*</sup> and G. Smagghe<sup>1\*</sup>

<sup>1</sup> Department of Crop Protection, Laboratory of Agrozoology, Faculty of Bioscience Engineering, Ghent University, Coupure Links 653, 9000 Ghent, Belgium; <sup>2</sup> Department of Applied Biosciences, Faculty of Bioscience Engineering, Ghent University, Valentin Vaerwyckweg 1, 9000 Ghent, Belgium; <sup>3</sup> Department of Bioanalysis, Laboratory of Food Analysis, Ghent University, Ottergemsesteenweg 460, 9000 Ghent, Belgium

Correspondence: kris.audenaert@ugent.be

**Supplementary Figure 1** Alignment of ribosomal protein L3 (RPL3) sequences from different aphid species and yeast. RPL3 sequences of *Sitobion avenae*, predicted 60S RPL3 *Acyrtosiphon pisum* (NCBI Reference Sequence: XP\_001951042.1), predicted 60S RPL3 *Diuraphis noxia* (NCBI Reference Sequence: XP\_015366271.1), 60S RPL3 *Aphis gossypii* (GenBank: AGT79995.1) and RPL3 *Saccharomyces cerevisiae* (GenBank: AAA88732.1) were aligned using BioEdit Sequence Alignment Editor (ClustalW Multiple alignment). Amino acid changes (S2P, P9L, W255R, W255C, H256Y) identified from *S. cerevisiae* conferring deoxynivalenol resistance are given below the sequences

```

SaRPL3      MSHRKFSAPR HGSMGFYPKK RARRHRGRVK SFPKDDPSKP IHLTAFIAYK AGMTHVVREA DRPGSKLNKK :70
ApRPL3      MSHRKFSAPR HGSMGFYPKK RARRHRGRVK SFPKDDPSKP IHLTAFIAYK AGMTHVVREA DRPGSKLNKK
DnRPL3      MSHRKFSAPR HGSMGFYPKK RARRHRGRVK SFPKDDPSKP IHLTAFIAYK AGMTHVVREA DRPGSKLNKK
AgRPL3      MSHRKFSAPR HGSMGFYPKK RARRHRGRVK SFPKDDPSKP IHLTAFIAYK AGMTHVVREA DRPGSKLNKK
ScRPL3      MSHRKYEAPR HGHLGFLPRK RAASIRARVK AFPKDDRSKP VALTSFLGYK AGMTTIVRDL DRPGSKFHKK
           P       L

SaRPL3      EIVEPVTILE APPMIIVGVV GYVETPYGLK PLKTVFAEHL SEDCRRRFYK NWYKSKKKAF VKYSRWQDE :140
ApRPL3      EIVEPVTILE APPMIIVGVV GYVETPYGLK PLKTVFAEHL SEDCRRRFYK NWYKSKKKAF VKYSRWQDE
DnRPL3      EIVEPVTILE APPMIIVGVV GYVETPYGLK PLKTVFAEHL SEDCRRRFYK NWYKSKKKAF VKYSRWQDE
AgRPL3      EIVEPVTILE APPMIIVGVV GYVETPYGLK PLKTVFAEHL SEDCRRRFYK NWYKSKKKAF VKYSRWQDE
ScRPL3      EVVEAVTVVD TPPVVVVGVV GYVETPRGLR SLTTVWAEHL SDEVKRRFYK NWYKSKKKAF TKYSAKYAQD

SaRPL3      NGKRQIAKDL GKIAYYSKVI RVVAHTQMKL LKKRQKKAHI MEIQVNGGTI AEKVQWAKEH FEKPVVPSHV :210
ApRPL3      NGKRQIAKDL GKIAYYSKVI RVVAHTQMKL LKKRQKKAHI MEIQVNGGTV AEKVQWAKEH FEKPVVPSHV
DnRPL3      NGKRQIAKDL GKIAYYSKVI RVIAHTQMKL LKKRQKKAHI MEIQVNGGTV AEKVQWAKEH FEKPVVPSHV
AgRPL3      NGKRQIAKDL GKIAYYSKVI RVVAHTQMKL LKKRQKKAHI MEIQVNGGTV AEKVQWAKEH FEKPVVPSHV
ScRPL3      GAG--IEREL ARIKKYASVV RVLVHTQIRK TPLAQKKAHL AEIQLNGGSI SEKVDWAREH FEKTVAVDSV

SaRPL3      FAPDEMIDCI GVTKGRGYKG VTSRWHTKKL PRKTHKGLRK VACIGAWHPS RVQFTVARAG QKGYHHRTEI :280
ApRPL3      FAPDEMIDCI GVTKGRGYKG VTSRWHTKKL PRKTHKGLRK VACIGAWHPS RVQFTVARAG QKGYHHRTEI
DnRPL3      FAPDEMIDCI GVTKGRGYKG VTSRWHTKKL PRKTHKGLRK VACIGAWHPS RVQFTVARAG QKGYHHRTEI
AgRPL3      FAPDEMIDCI GVTKGRGYKG VTSRWHTKKL PRKTHKGLRK VACIGAWHPS RVQFTVARAG QKGYHHRTEI
ScRPL3      FEQNEMIDAI AVTKGHGFEG VTHRWGTTKL PRKTHRGLRK VACIGACHPA HVMWSVARAG QRGYHSRTSI
           RY
           C

SaRPL3      NKKIYRIGLG IHTKDGKVIK NNASTEYDLT EKTITPMGGF PHYGEVNDF LMIKGCCVGP KKRIVTLRKS :350
ApRPL3      NKKIYRIGLG IHTKDGKVIK NNASTEYDLT EKTITPMGGF PHYGEVNDF LMIKGCCVGP KKRIVTLRKS
DnRPL3      NKKIYRIGLG IHTKDGKVIK NNASTEYDLT EKTITPMGGF PHYGEVNDF LMIKGCCVGP KKRIVTLRKS
AgRPL3      NKKIYRIGLG IHTKDGKVIK NNASTEYDLT EKTITPMGGF PHYGEVNDF LMIKGCCVGP KKRIVTLRKS
ScRPL3      NHKIYRVGKG DDEANG---- ---ATSFDR T KKTITPMGGF VHYGEIKNDF IMVKGCIIPGN RKRIVTLRKS

SaRPL3      LLVHTKRAAL ESINLKFIDT SSKFGHGRFQ TIADKAAFMS PLKKDRIRIE E----- :410
ApRPL3      LLVHTKRAAL ESINLKFIDT SSKFGHGRFQ TVADKAAFMS PLKKDRIRIE EKATAAAK
DnRPL3      LLVHTKRAAL ESINLKFIDT SSKFGHGRFQ TVADKAAFMS PLKKDRIRIE EKATAAAK
AgRPL3      LLVHTKRAAL ESINLKFIDT SSKFGHGRFQ TVADKAAFMS PLKKDRIRIE EKATAAAK
ScRPL3      LYTNTSRKAL EEVSLKWIDT ASKFGKGRFQ TPAEKHAFMS TLKKDL---- -----

```

**Supplementary Figure 2** Chemical structure of the DON derivatives DON-3G (A), 3-ADON (B) and 15-ADON (C)

A

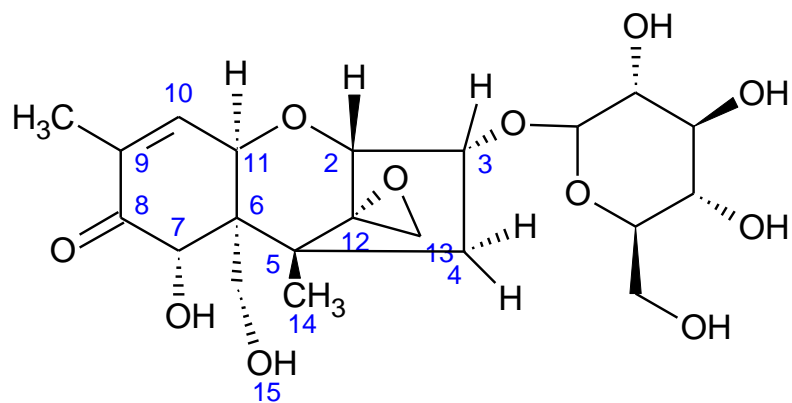

B

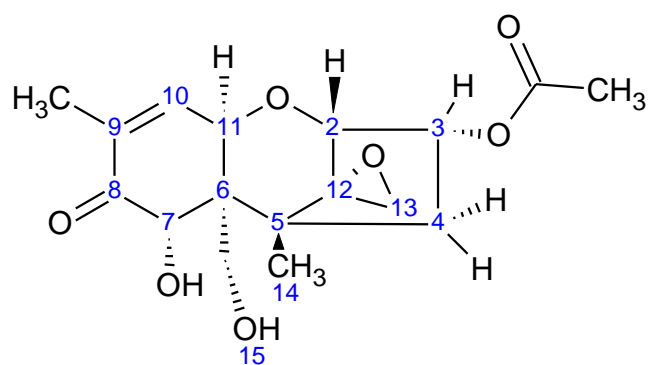

C

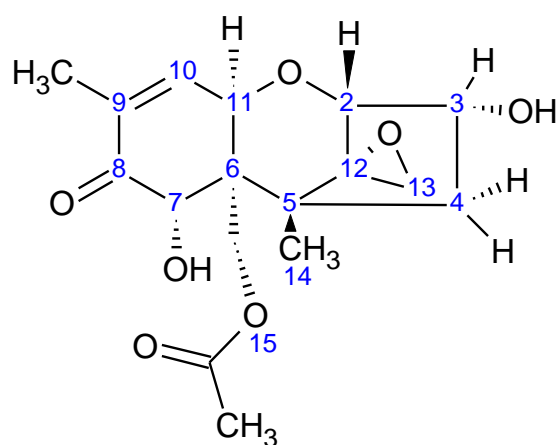

Supplement: srep38640-s1.pdf [file srep38640-s1.pdf]
